# Supplementary material for: Enhanced microwave absorption material of ternary nanocomposites based on MnFe2O4@SiO2, polyaniline and polyvinylidene fluoride
Source: Royal Society of Chemistry journal article supplement (doi:10.1039/c6ra17076e), 2016-01-01
Supplement: c6ra17076e1.pdf [file c6ra17076e1.pdf]

## Electronic Supplementary Information for

### **Enhanced Microwave Absorption Material of Ternary Nanocomposites Based on MnFe<sub>2</sub>O<sub>4</sub>@SiO<sub>2</sub>, Polyaniline and Polyvinylidene Fluoride**

Jia-Qiang Zhu, § Xiao-Juan Zhang, § Shan-Wen Wang, Guang-Sheng Wang\* and Peng-Gang Yin\*

*Key Laboratory of Bio-Inspired Smart Interfacial Science and Technology of Ministry of Education, School of Chemistry and Environment, Beihang University, Beijing 100191, PR China. E-mail: wanggsh@buaa.edu.cn; pgyin@buaa.edu.cn*

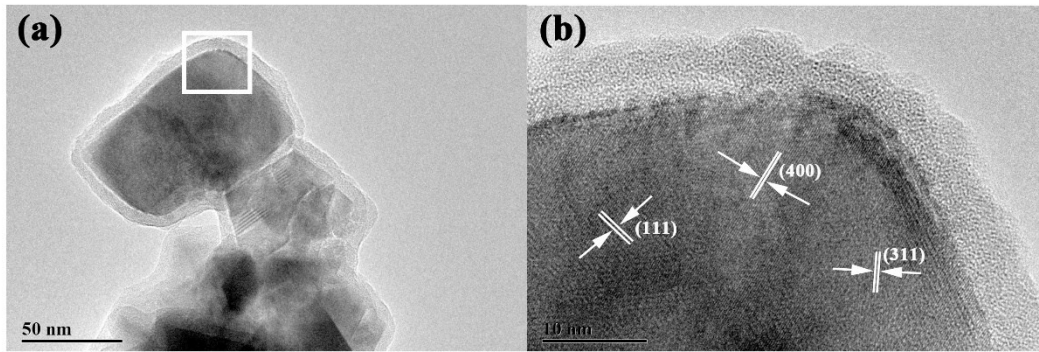

**Fig. S1.** The magnified TEM image (a) and high-resolution TEM image (b) of MnFe<sub>2</sub>O<sub>4</sub>@SiO<sub>2</sub> nanoparticles

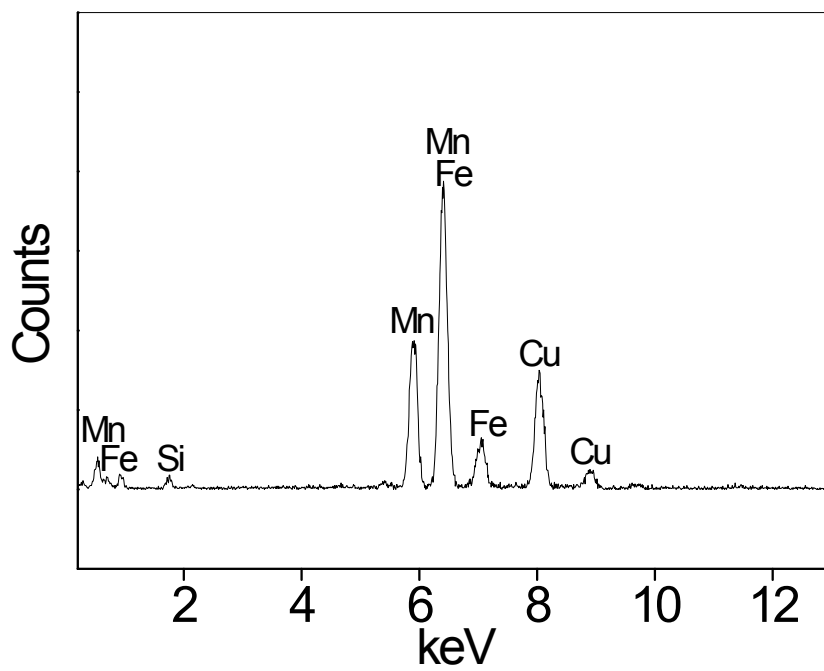

**Fig. S2.** The EDX spectrum of MnFe<sub>2</sub>O<sub>4</sub>@SiO<sub>2</sub> nanoparticles

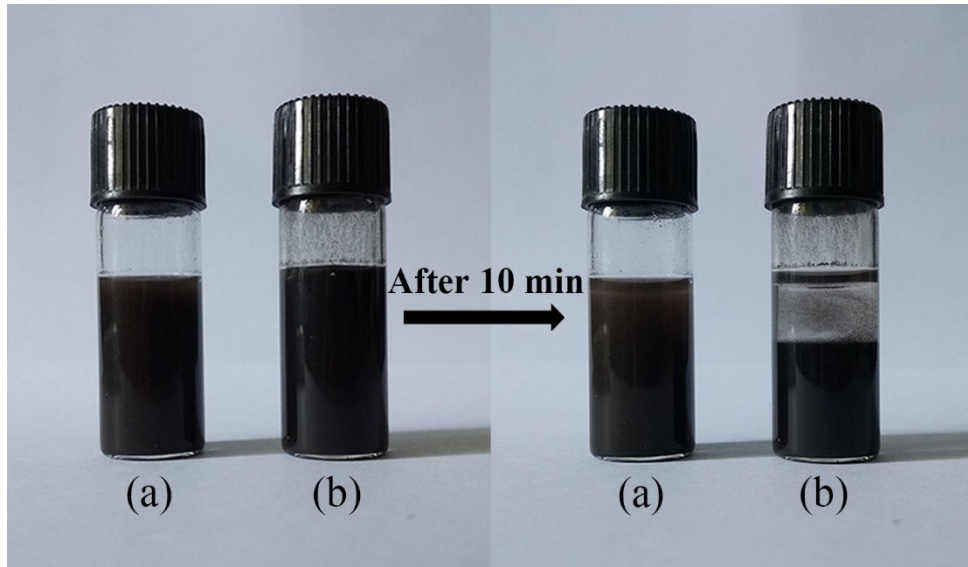

**Fig. S3.** The photograph of (a)  $\text{MnFe}_2\text{O}_4@\text{SiO}_2$  nanoparticles and (b)  $\text{MnFe}_2\text{O}_4$  nanoparticles disperse in DMF

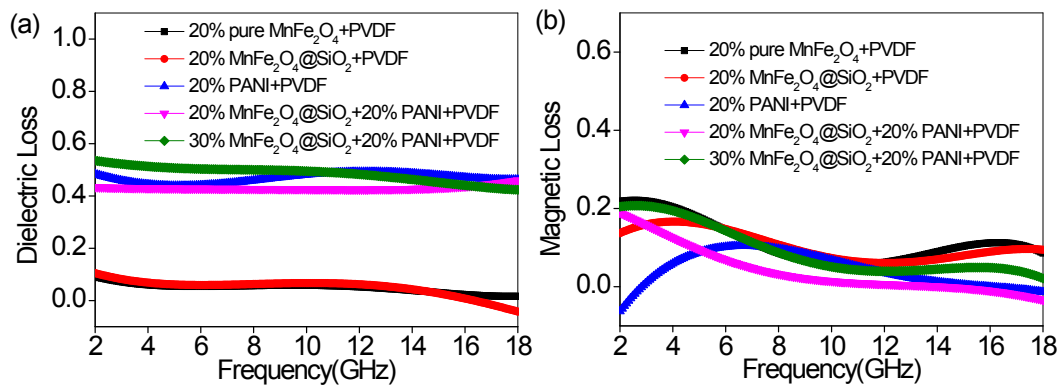

**Fig. S4.** Frequency dependence on (a) dielectric loss and (b) magnetic loss of samples.
